# Supplementary material for: Evaluation of tin nitride (Sn3N4) via atomic layer deposition using novel volatile Sn precursors
Source: Royal Society of Chemistry journal article supplement (doi:10.1039/d3dt02138f), 2023-01-01
Supplement: d3dt02138f1.pdf [file d3dt02138f1.pdf]

## **Supporting Information:**

# **Evaluation of Tin Nitride (Sn<sub>3</sub>N<sub>4</sub>) via Atomic Layer Deposition Using Novel Volatile Sn Precursors**

Hyeonbin Park,<sup>a,b‡</sup> Heenang Choi,<sup>a,c‡</sup> Sunyoung Shin,<sup>a</sup> Bo Keun Park,<sup>a,d</sup> Kibum Kang,<sup>b</sup> Ji Yeon Ryu<sup>a,\*</sup>  
Taeyong Eom,<sup>a,\*</sup> Taek-Mo Chung<sup>a,d\*</sup>

<sup>a</sup>*Thin Film Materials Research Center, Korea Research Institute of Chemical Technology, Daejeon 34114, Republic of Korea*

<sup>b</sup>*Department of Materials Science and Engineering Korea Advanced Institute of Science and Technology (KAIST) 291 Daehak-ro, Yuseong-gu, Daejeon 34141, Republic of Korea*

<sup>c</sup>*Department of Chemistry, Sungkyunkwan University (SKKU), 2066 Seobu-ro, Jangan-gu, Suwon-si, Gyeonggi-do 16419, Republic of Korea*

<sup>d</sup>*Department of Chemical Convergence Materials, University of Science and Technology (UST), 217 Gajeong-ro, Yuseong-gu, Daejeon 34113, Republic of Korea*

‡These authors contributed equally

### **Table of Contents:**

- 1. NMR spectra of L2H**
- 2. IR spectra of 1 – 3**
- 3. NMR spectra of 1 – 3**
- 4. MASS spectra of 1 – 3**
- 5. X-ray structure determination of 1 – 3**
- 6. Geometrical parameters in 1 – 3 as measured by single-crystal XRD and DFT calculation.**
- 7. Additional chemical properties of deposited film**
- 8. Calculation of geometry index of 1 – 3**

# 1. NMR spectra of L2H

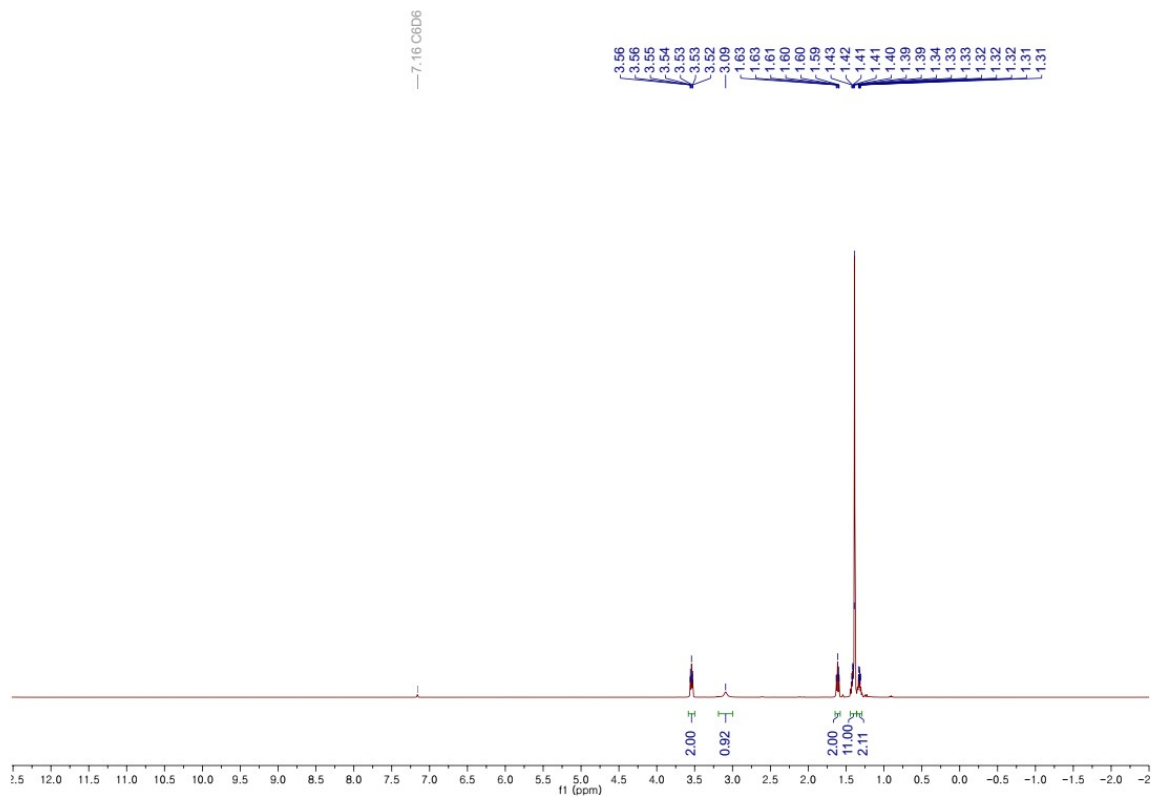

Figure S1-1. <sup>1</sup>H NMR spectrum of L2H

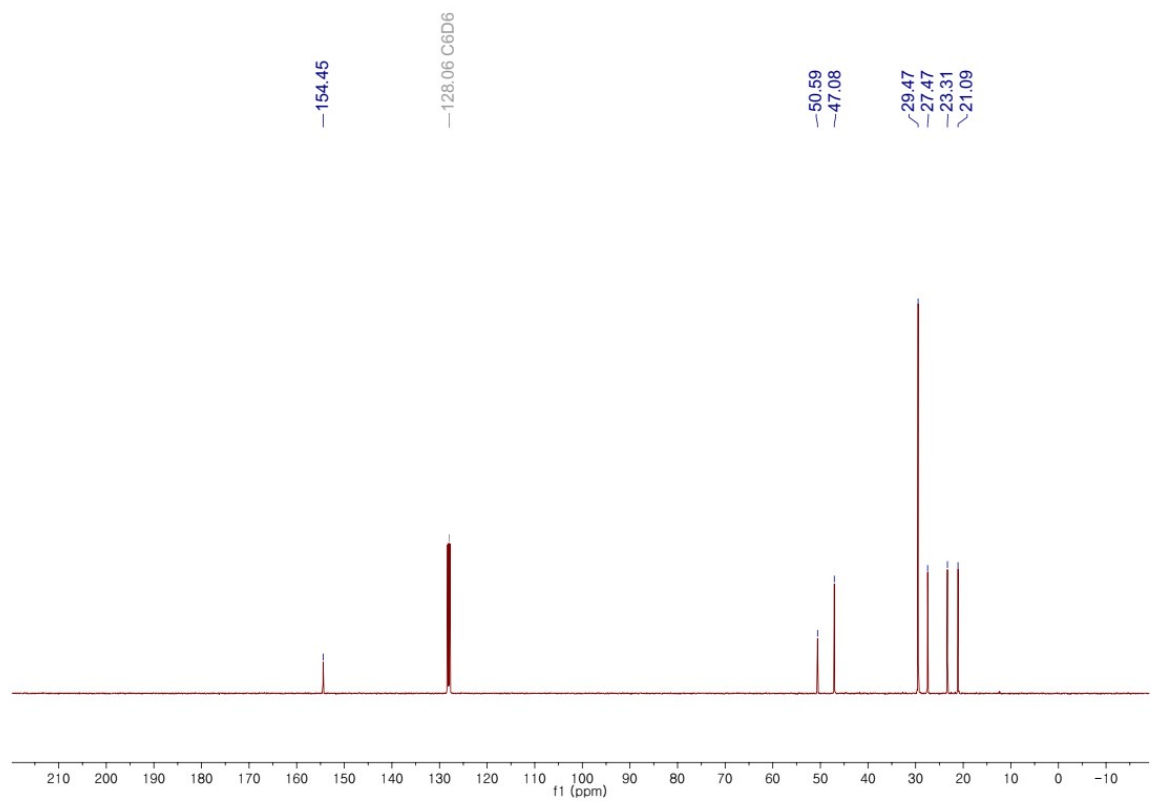

Figure S1-2. <sup>13</sup>C NMR spectrum of L2H

## 2. IR spectra of 1 – 3

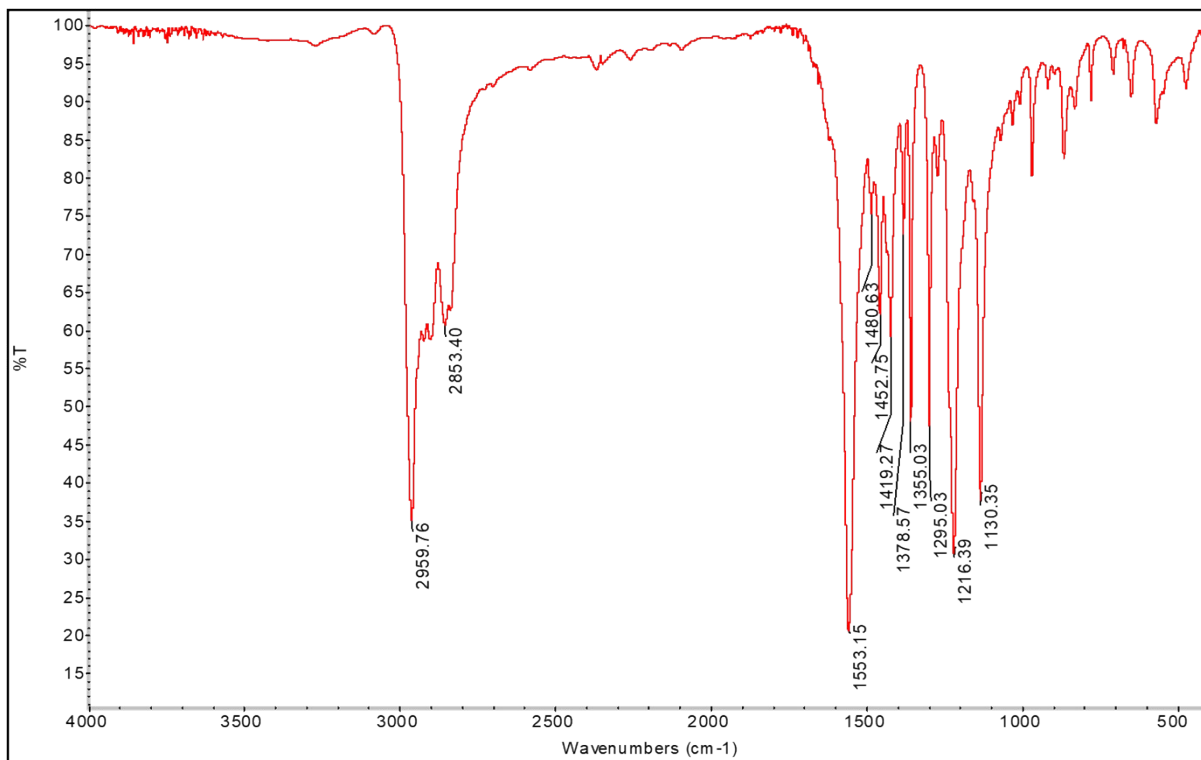

Figure S2-1. IR spectra of 1

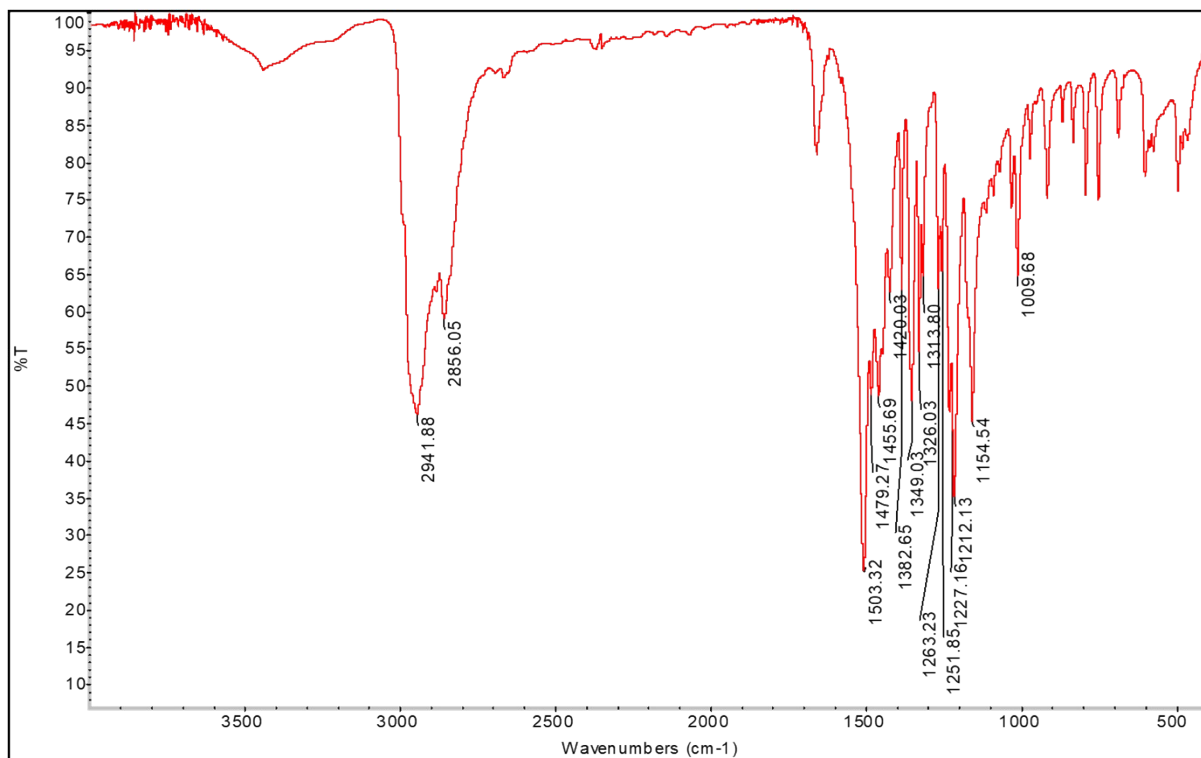

Figure S2-2. IR spectra of 2

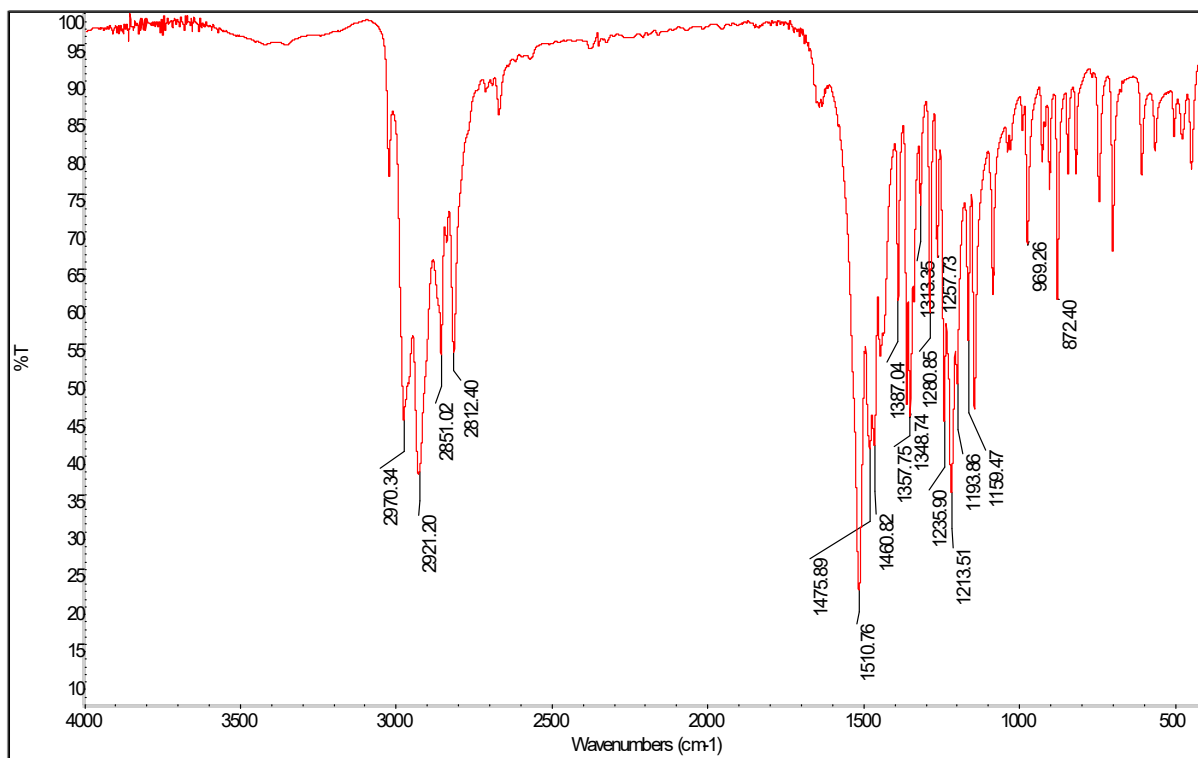

Figure S2-3. IR spectra of **3**

### 3. NMR spectra of 1 – 3

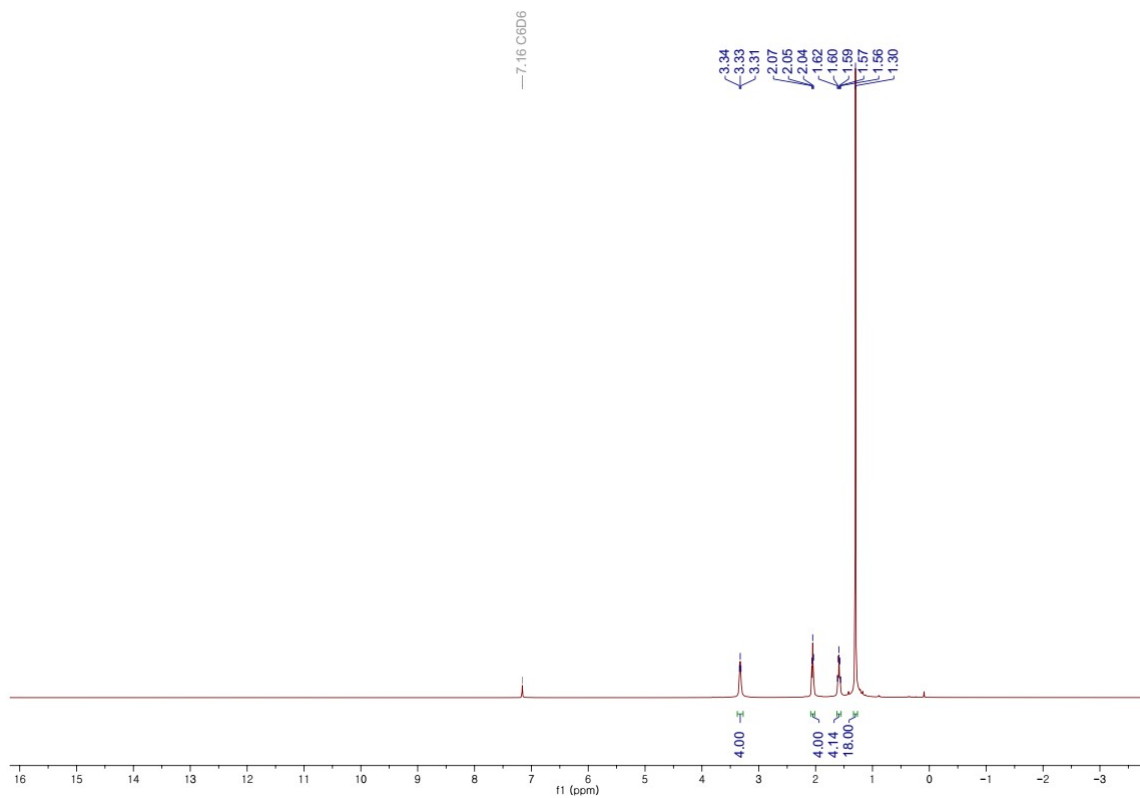

Figure S3-1.  $^1\text{H}$  NMR spectrum of **1**

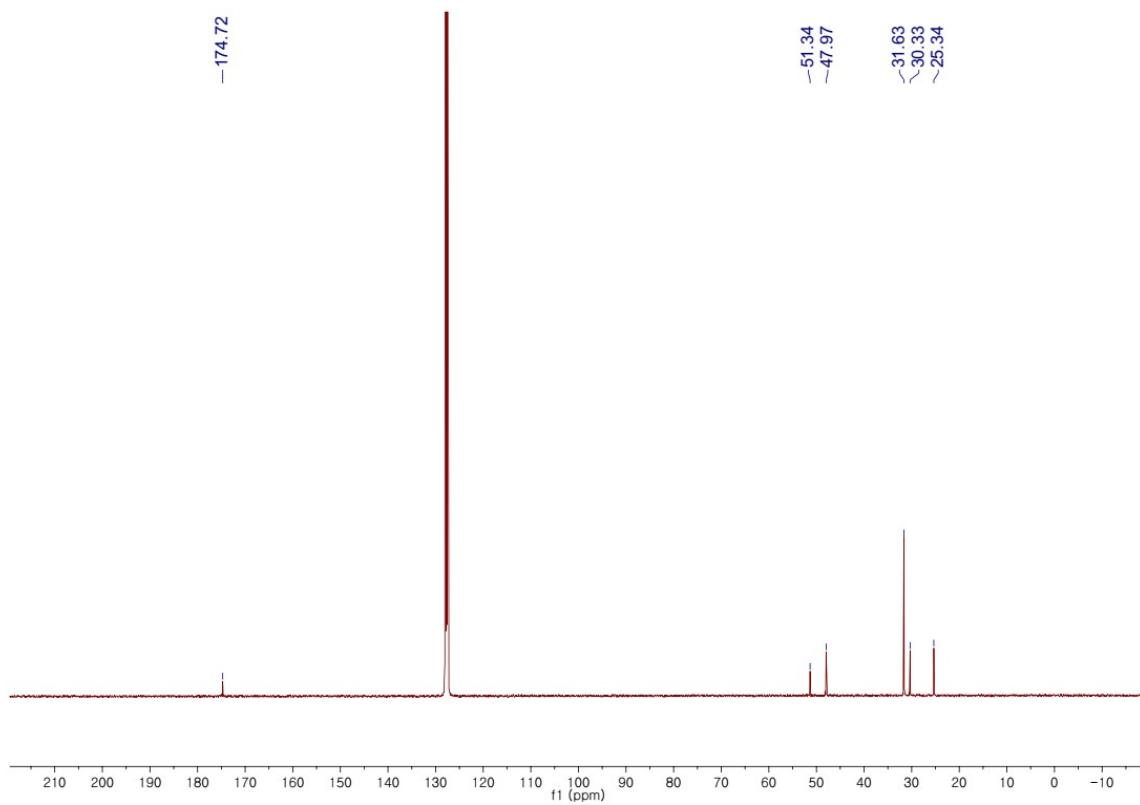

Figure S3-2.  $^{13}\text{C}$  NMR spectrum of **1**

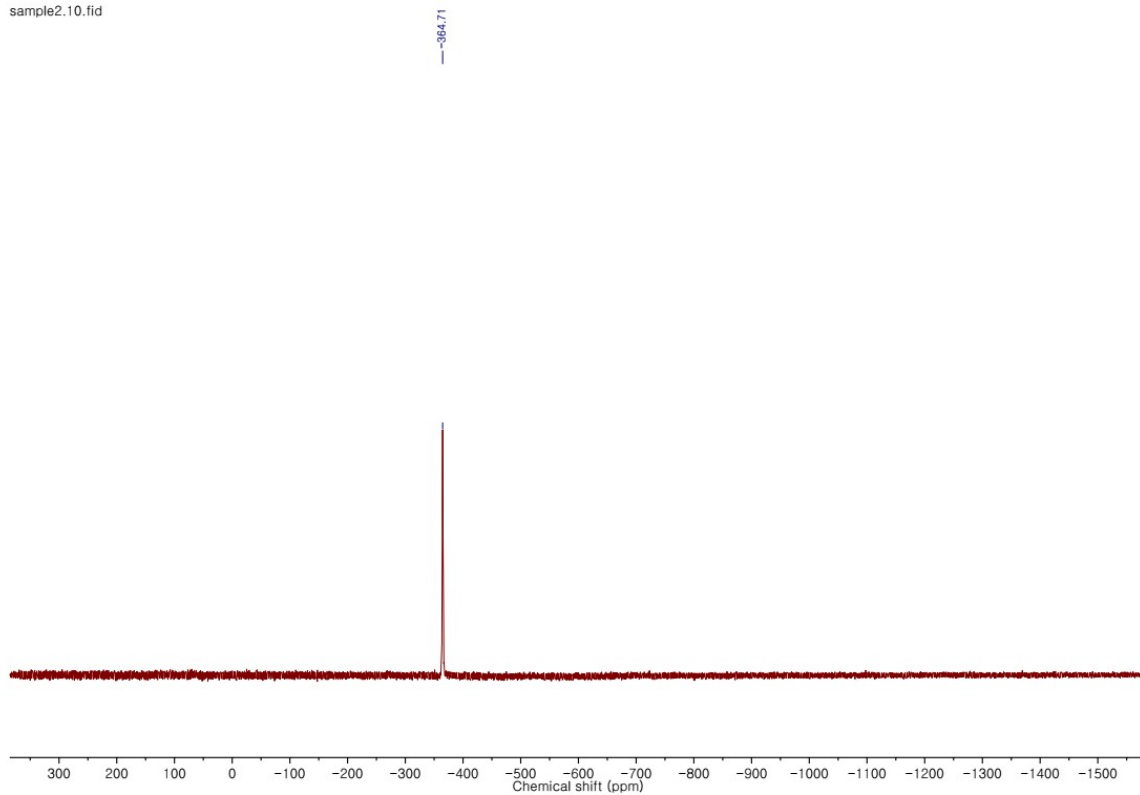

Figure S3-3.  $^{119}\text{Sn}$  NMR spectrum of **1**

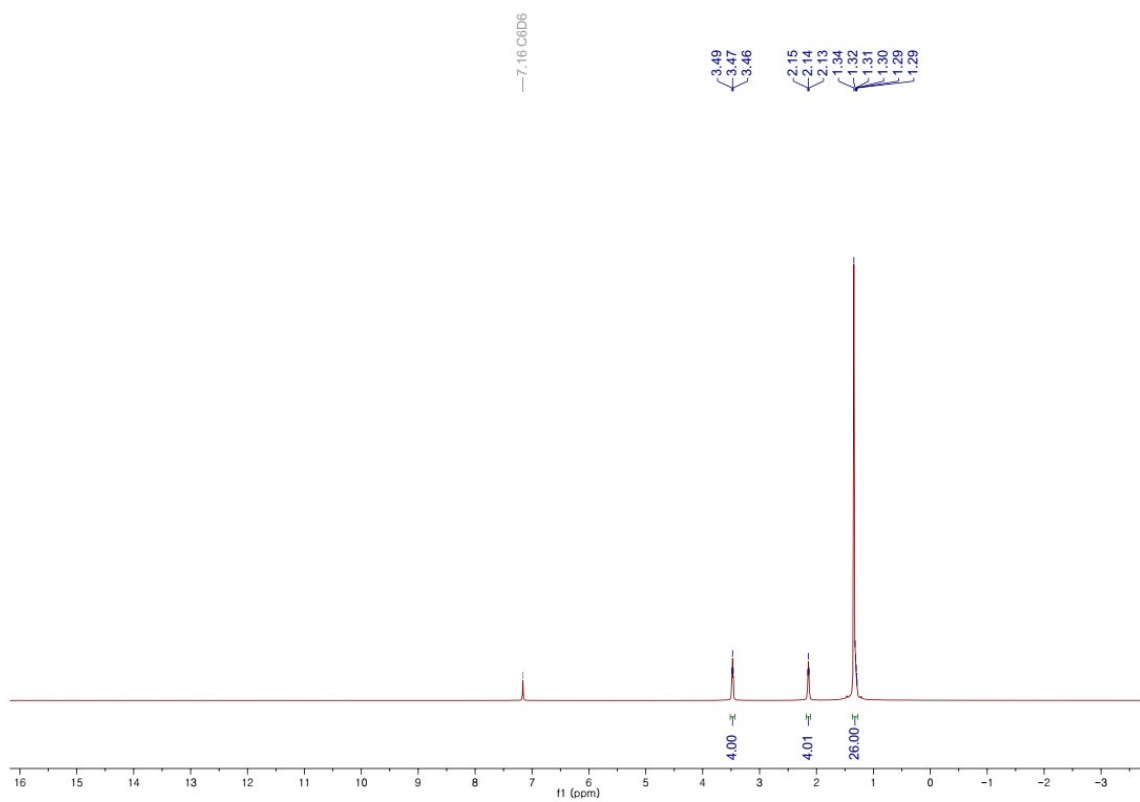

Figure S3-4.  $^1\text{H}$  NMR spectrum of **2**

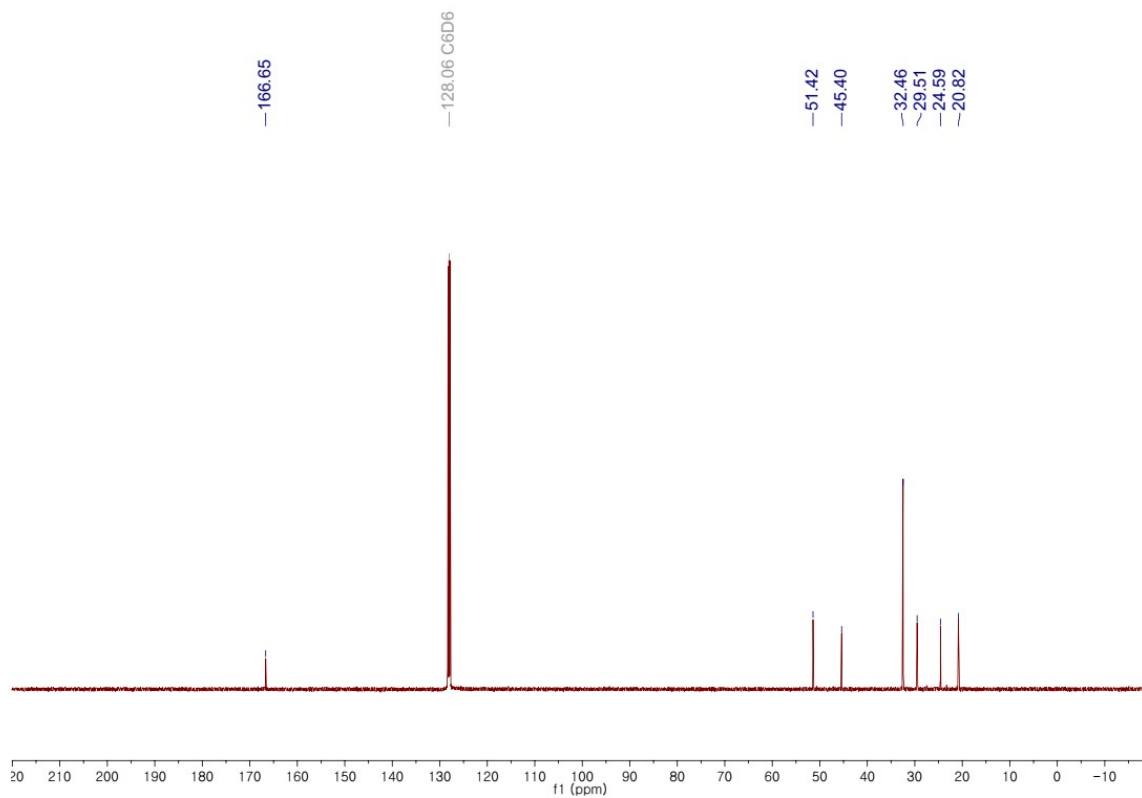

**Figure S3-5.** <sup>13</sup>C NMR spectrum of **2**

sample4.10.fid

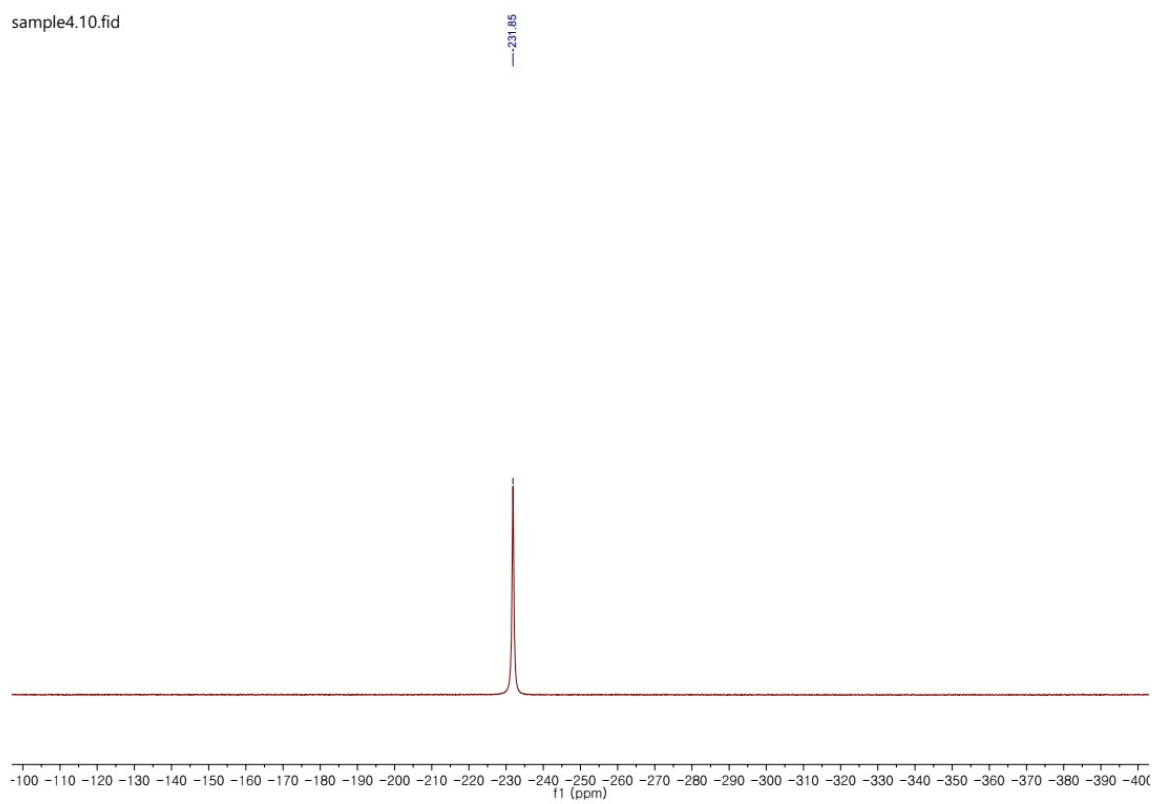

**Figure S3-6.** <sup>119</sup>Sn NMR spectrum of **2**

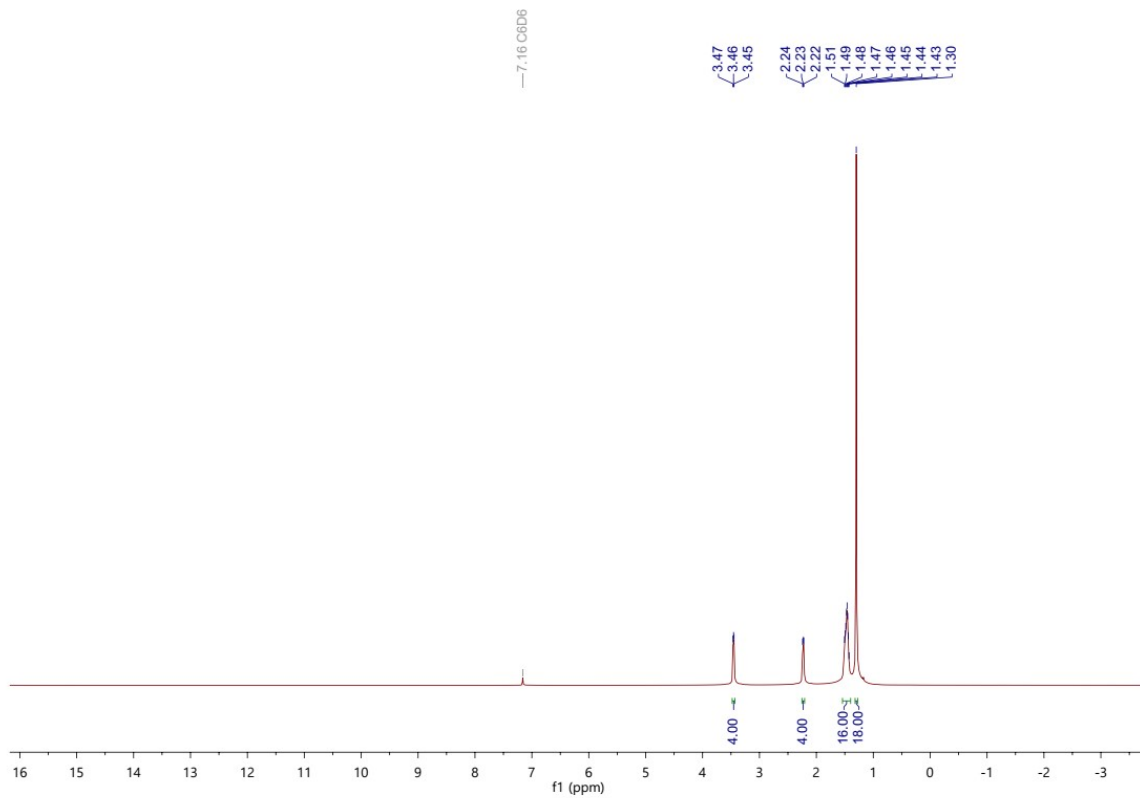

Figure S3-7.  $^1\text{H}$  NMR spectrum of **3**

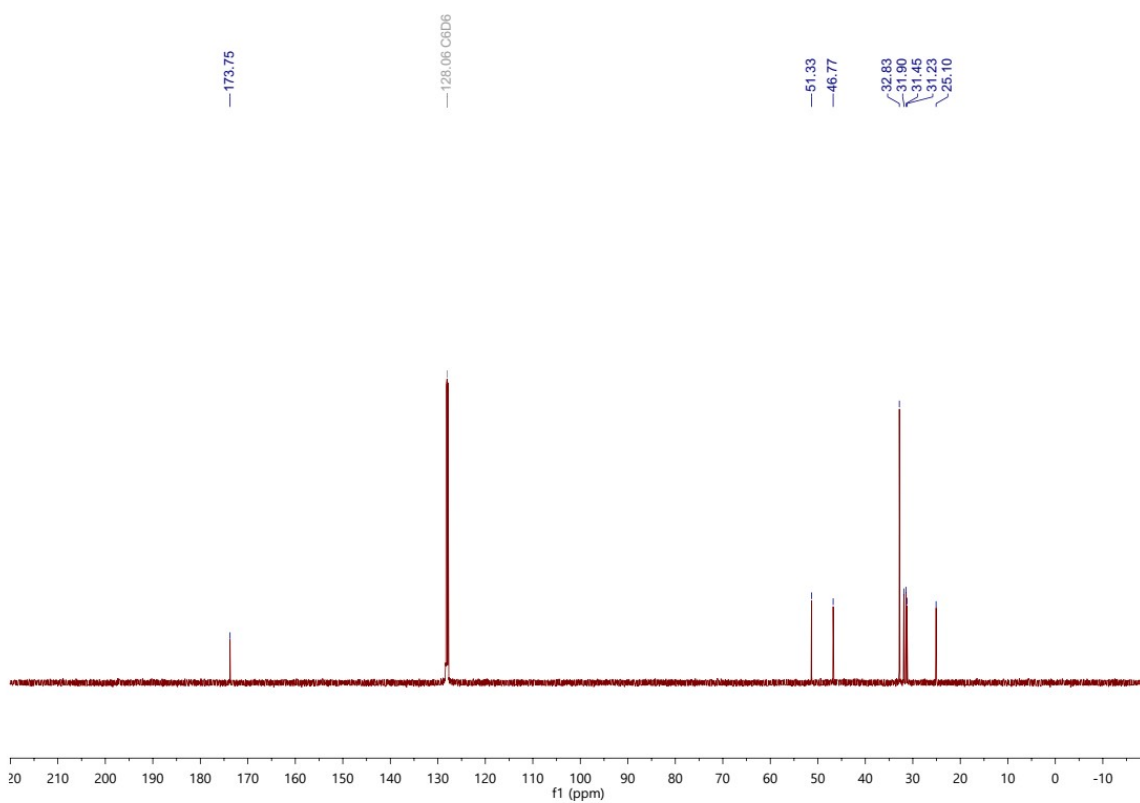

Figure S3-8.  $^{13}\text{C}$  NMR spectrum of **3**



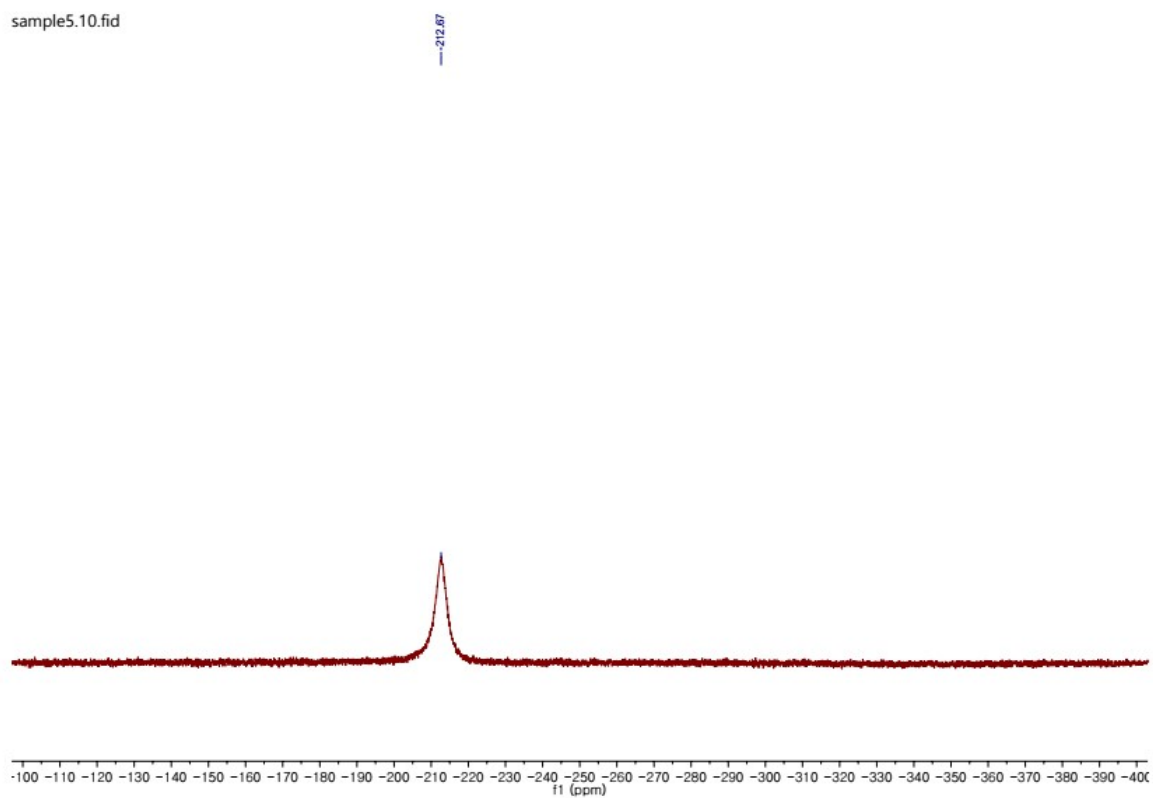

**Figure S3-9.**  $^{119}\text{Sn}$  NMR spectrum of **3**

#### 4. MASS spectra of 1 – 3

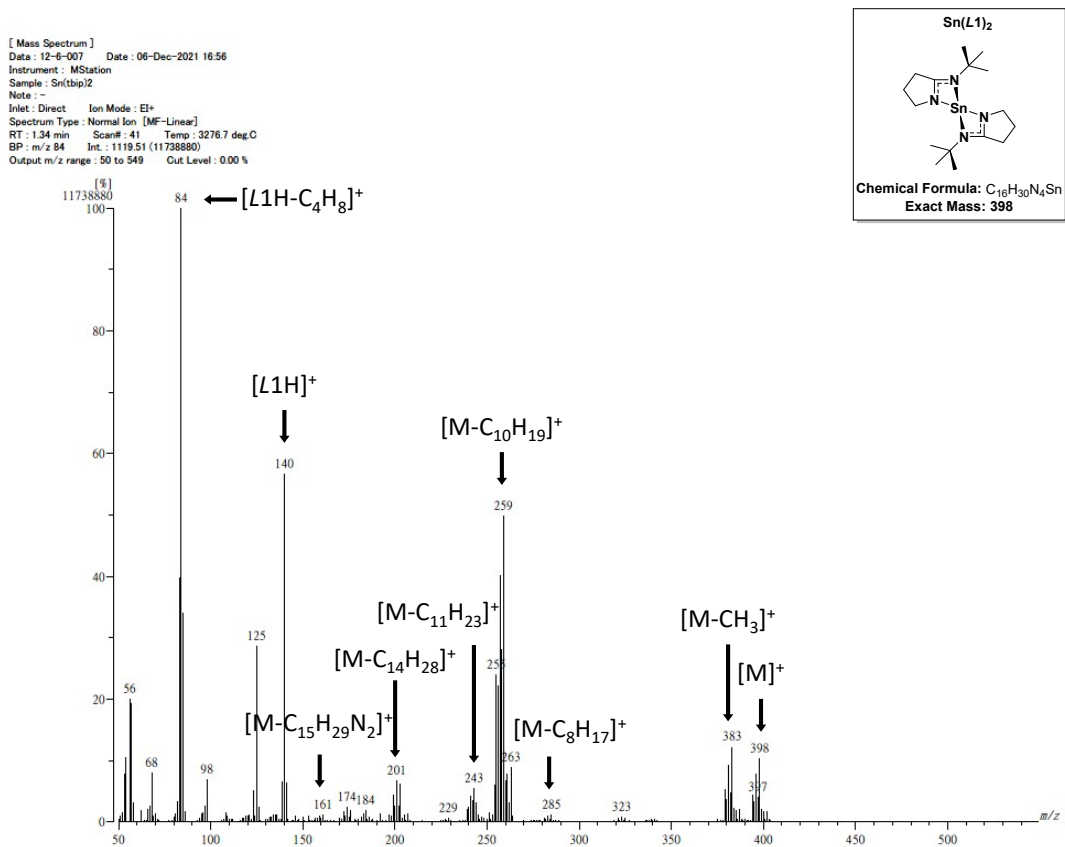

Figure S4-1. MASS spectra of 1

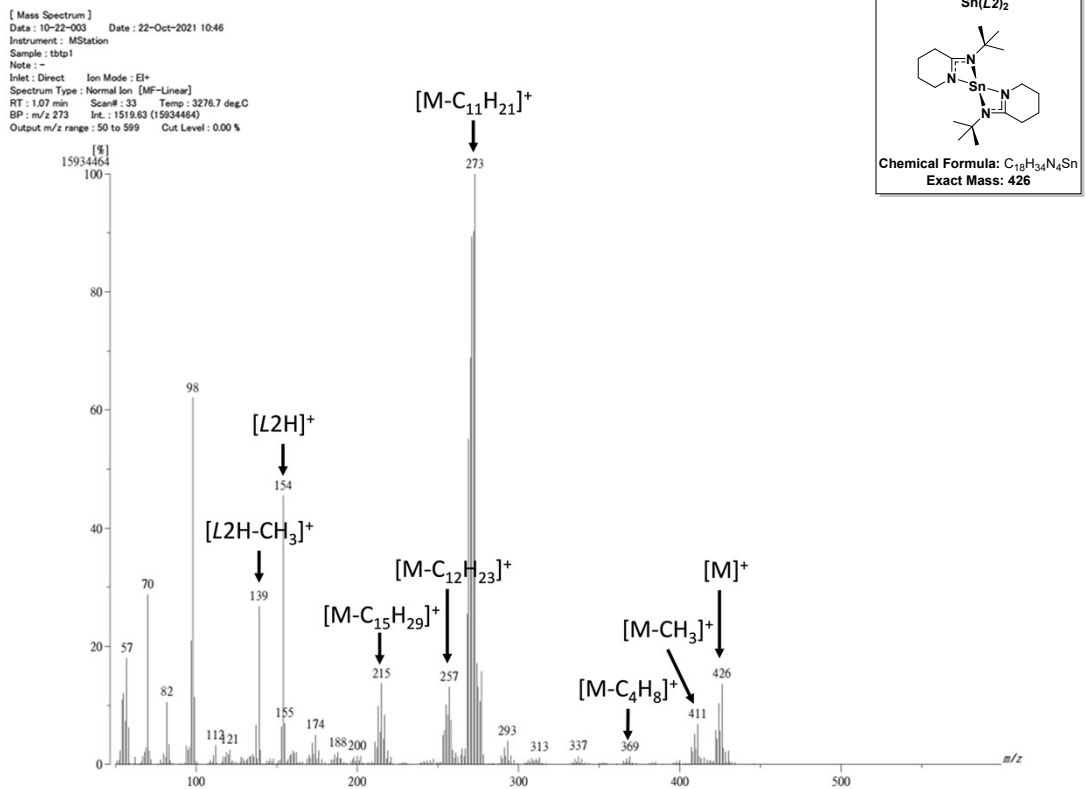

Figure S4-2. MASS spectra of 2

[Mass Spectrum]  
 Data : 12-6-010 Date : 06-Dec-2021 17:45  
 Instrument : MStation  
 Sample : Sn(tbtal)2  
 Note : -  
 Inlet : Direct Ion Mode : EIP  
 Spectrum Type : Normal Ion (MF-Linear)  
 RT : 1.04 min Scan# : 32 Temp : 3276.7 deg C  
 BP : m/z 286 Int. : 1049.83 (11008256)  
 Output m/z range : 50 to 599 Cut Level : 0.00 %

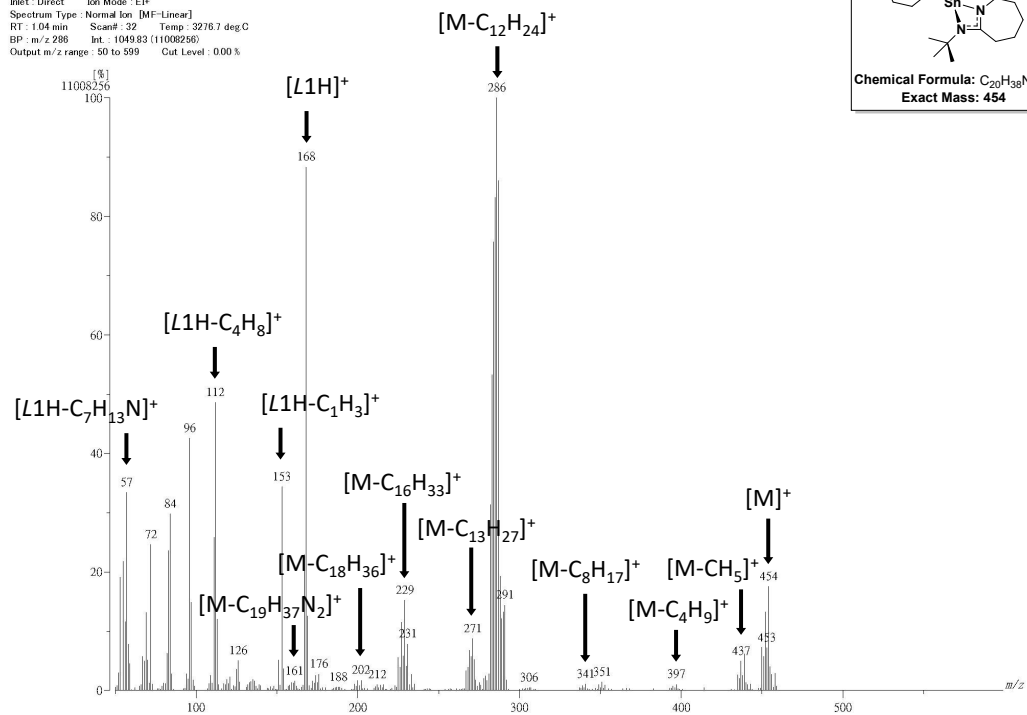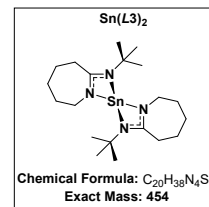

**Figure S4-3.** MASS spectra of **3**

## 5. X-ray structure determination of 1 – 3

**Table S1.** Crystallographic data and parameters for 1 – 3

| Complex                                                           | 1                                                                  | 2                                                                   | 3                                                                   |
|-------------------------------------------------------------------|--------------------------------------------------------------------|---------------------------------------------------------------------|---------------------------------------------------------------------|
| Identification code                                               | 20210907LT                                                         | 20211025LT                                                          | 20211104LT                                                          |
| Formula                                                           | C <sub>16</sub> H <sub>30</sub> N <sub>4</sub> Sn                  | C <sub>18</sub> H <sub>34</sub> N <sub>4</sub> Sn                   | C <sub>20</sub> H <sub>38</sub> N <sub>4</sub> Sn                   |
| Formula weight                                                    | 397.13                                                             | 425.18                                                              | 453.23                                                              |
| Crystal system                                                    | Monoclinic                                                         | Monoclinic                                                          | Orthorhombic                                                        |
| Space group                                                       | P21/c                                                              | P21/n                                                               | P212121                                                             |
| <i>a</i> (Å)                                                      | 11.2786(7)                                                         | 12.1302(4)                                                          | 9.4658(7)                                                           |
| <i>b</i> (Å)                                                      | 19.0407(11)                                                        | 10.2568(4)                                                          | 12.5449(9)                                                          |
| <i>c</i> (Å)                                                      | 8.7371(5)                                                          | 16.2262(5)                                                          | 18.9905(13)                                                         |
| $\alpha$ (°)                                                      | 90°                                                                | 90°                                                                 | 90°                                                                 |
| $\beta$ (°)                                                       | 104.920(3)                                                         | 102.8310(10)°                                                       | 90°                                                                 |
| $\gamma$ (°)                                                      | 90°                                                                | 90°                                                                 | 90°                                                                 |
| <i>V</i> (Å <sup>3</sup> )                                        | 1813.06(19)                                                        | 1968.40(12)                                                         | 2255.1(3)                                                           |
| <i>Z</i>                                                          | 4                                                                  | 4                                                                   | 4                                                                   |
| $\rho_{\text{calc}}$ (g cm <sup>-3</sup> )                        | 1.455                                                              | 1.435                                                               | 1.335                                                               |
| $\mu$ (mm <sup>-1</sup> )                                         | 1.410                                                              | 1.304                                                               | 1.143                                                               |
| <i>F</i> (000)                                                    | 816                                                                | 880                                                                 | 944                                                                 |
| <i>T</i> (K)                                                      | 100(1)                                                             | 100(1)                                                              | 100(1)                                                              |
| Two theta range (°)                                               | 2.139 to 28.281                                                    | 2.366 to 25.999                                                     | 1.946 to 26.000                                                     |
| <i>hkl</i> range                                                  | -14<= <i>h</i> <=14,<br>-25<= <i>k</i> <=25,<br>-9<= <i>l</i> <=11 | -14<= <i>h</i> <=14,<br>-12<= <i>k</i> <=12,<br>-20<= <i>l</i> <=12 | -11<= <i>h</i> <=11,<br>-15<= <i>k</i> <=12,<br>-23<= <i>l</i> <=23 |
| Data / restraints / parameters                                    | 4463 / 0 / 196                                                     | 3818 / 4 / 215                                                      | 4435 / 0 / 233                                                      |
| GOF on <i>F</i> <sup>2</sup>                                      | 1.051                                                              | 1.068                                                               | 1.093                                                               |
| <i>R</i> <sub>1</sub> <sup>a</sup> ( <i>I</i> > 2σ( <i>I</i> ))   | 0.0281                                                             | 0.0257                                                              | 0.0173                                                              |
| w <i>R</i> <sub>2</sub> <sup>b</sup> ( <i>I</i> > 2σ( <i>I</i> )) | 0.0619                                                             | 0.0619                                                              | 0.0446                                                              |
| $\rho_{\text{fin}}$ (max/min) (e Å <sup>-3</sup> )                | 1.085/-0.321                                                       | 1.526/-0.332                                                        | 1.108/-0.471                                                        |

<sup>a</sup>  $R_1 = \sum ||F_o| - |F_c|| / \sum |F_o|$ . <sup>b</sup>  $wR_2 = \{[\sum w(F_o^2 - F_c^2)^2] / [\sum w(F_o^2)^2]\}^{1/2}$ .

## 6. Geometrical parameters in 1 – 3 as measured by single-crystal XRD and DFT calculation

n.

**Table S2.** The selected bond length (Å) and angles (°) of **1**

| Geometrical parameters  | Experimental | DFT calculation <sup>a</sup> |
|-------------------------|--------------|------------------------------|
| <i>Bond Lengths (Å)</i> |              |                              |
| Sn(1)-N(4)              | 2.1686(17)   | 2.173                        |
| Sn(1)-N(2)              | 2.1940(17)   | 2.173                        |
| Sn(1)-N(3)              | 2.3826(17)   | 2.399                        |
| Sn(1)-N(1)              | 2.3868(17)   | 2.400                        |
| N(1)-C(1)               | 1.311(3)     | 1.323                        |
| N(1)-C(5)               | 1.465(3)     | 1.474                        |
| N(2)-C(1)               | 1.337(3)     | 1.354                        |
| N(2)-C(4)               | 1.459(3)     | 1.467                        |
| N(3)-C(9)               | 1.307(3)     | 1.323                        |
| N(3)-C(13)              | 1.465(3)     | 1.474                        |
| N(4)-C(9)               | 1.341(3)     | 1.354                        |
| N(4)-C(12)              | 1.453(3)     | 1.467                        |
| C(1)-C(2)               | 1.517(3)     | 1.521                        |
| C(9)-C(10)              | 1.524(3)     | 1.521                        |
| <i>Bond Angles (°)</i>  |              |                              |
| N(4)-Sn(1)-N(2)         | 96.95(7)     | 97.46                        |
| N(4)-Sn(1)-N(3)         | 58.19(6)     | 58.43                        |
| N(2)-Sn(1)-N(3)         | 90.11(6)     | 87.27                        |
| N(4)-Sn(1)-N(1)         | 86.99(6)     | 87.27                        |
| N(2)-Sn(1)-N(1)         | 58.22(6)     | 58.43                        |
| N(3)-Sn(1)-N(1)         | 130.73(6)    | 128.69                       |
| C(1)-N(1)-C(5)          | 126.35(18)   | 127.39                       |
| C(1)-N(1)-Sn(1)         | 88.93(13)    | 89.24                        |
| C(5)-N(1)-Sn(1)         | 144.57(13)   | 143.33                       |
| C(1)-N(2)-C(4)          | 111.51(17)   | 112.33                       |
| C(1)-N(2)-Sn(1)         | 96.83(13)    | 98.48                        |
| C(4)-N(2)-Sn(1)         | 147.10(14)   | 148.21                       |
| C(9)-N(3)-C(13)         | 128.64(18)   | 127.38                       |
| C(9)-N(3)-Sn(1)         | 89.22(12)    | 89.26                        |

|                   |            |        |
|-------------------|------------|--------|
| C(13)-N(3)-Sn(1)  | 141.37(13) | 143.32 |
| C(9)-N(4)-C(12)   | 112.22(17) | 112.32 |
| C(9)-N(4)-Sn(1)   | 97.90(13)  | 98.46  |
| C(12)-N(4)-Sn(1)  | 145.45(14) | 148.20 |
| N(1)-C(1)-N(2)    | 115.18(19) | 113.62 |
| N(1)-C(1)-C(2)    | 133.7(2)   | 135.30 |
| N(2)-C(1)-C(2)    | 111.02(18) | 111.03 |
| C(1)-C(2)-C(3)    | 102.63(18) | 102.19 |
| C(1)-C(2)-H(2A)   | 111.2      | 113.11 |
| C(1)-C(2)-H(2B)   | 111.2      | 109.41 |
| N(2)-C(4)-C(3)    | 103.71(17) | 103.50 |
| N(2)-C(4)-H(4A)   | 111.0      | 111.19 |
| N(2)-C(4)-H(4B)   | 111.0      | 110.92 |
| N(1)-C(5)-C(8)    | 105.48(17) | 105.97 |
| N(1)-C(5)-C(7)    | 109.80(17) | 110.47 |
| N(1)-C(5)-C(6)    | 113.23(18) | 111.76 |
| N(3)-C(9)-N(4)    | 113.95(19) | 113.62 |
| N(3)-C(9)-C(10)   | 135.5(2)   | 135.60 |
| N(4)-C(9)-C(10)   | 110.53(18) | 111.03 |
| C(9)-C(10)-C(11)  | 102.73(18) | 102.18 |
| C(9)-C(10)-H(10A) | 111.2      | 113.11 |
| C(9)-C(10)-H(10B) | 111.2      | 109.40 |
| N(4)-C(12)-C(11)  | 103.93(17) | 103.50 |
| N(4)-C(12)-H(12A) | 111.0      | 111.20 |
| N(4)-C(12)-H(12B) | 111.0      | 110.92 |
| N(3)-C(13)-C(14)  | 109.07(18) | 110.47 |
| N(3)-C(13)-C(15)  | 105.93(17) | 105.97 |
| N(3)-C(13)-C(16)  | 114.51(18) | 111.75 |

---

**Table S3.** The selected bond length (Å) and angels (°) of **2**

| Geometrical parameters  | Experimental | DFT calculation <sup>a</sup> |
|-------------------------|--------------|------------------------------|
| <i>Bond Lengths (Å)</i> |              |                              |
| Sn(1)-N(1)              | 2.1888(17)   | 2.171                        |
| Sn(1)-N(2)              | 2.3464(18)   | 2.378                        |
| Sn(1)-N(3)              | 2.1797(17)   | 2.177                        |
| Sn(1)-N(4)              | 2.3672(17)   | 2.355                        |
| N(1)-C(1)               | 1.339(3)     | 1.355                        |
| N(1)-C(5)               | 1.458(3)     | 1.462                        |
| N(2)-C(1)               | 1.321(3)     | 1.334                        |
| N(2)-C(6)               | 1.475(3)     | 1.479                        |
| N(3)-C(10)              | 1.349(3)     | 1.351                        |
| N(3)-C(14)              | 1.449(3)     | 1.462                        |
| N(4)-C(10)              | 1.318(3)     | 1.337                        |
| N(4)-C(15)              | 1.468(3)     | 1.477                        |
| C(1)-C(2)               | 1.515(3)     | 1.517                        |
| C(10)-C(11)             | 1.514(3)     | 1.518                        |
| <i>Bond Angles (°)</i>  |              |                              |
| N(1)-Sn(1)-N(2)         | 57.98(6)     | 58.21                        |
| N(1)-Sn(1)-N(4)         | 90.40(6)     | 87.34                        |
| N(2)-Sn(1)-N(4)         | 130.15(6)    | 129.9                        |
| N(3)-Sn(1)-N(1)         | 101.99(7)    | 93.77                        |
| N(3)-Sn(1)-N(2)         | 89.52(6)     | 86.55                        |
| N(3)-Sn(1)-N(4)         | 58.03(6)     | 58.4                         |
| C(1)-N(1)-Sn(1)         | 97.89(13)    | 99.5                         |
| C(5)-N(1)-Sn(1)         | 137.48(13)   | 135.45                       |
| C(1)-N(2)-Sn(1)         | 91.27(13)    | 90.81                        |
| C(6)-N(2)-Sn(1)         | 138.69(13)   | 138.47                       |
| C(10)-N(3)-Sn(1)        | 98.07(13)    | 99.03                        |
| C(14)-N(3)-Sn(1)        | 134.65(13)   | 135.86                       |
| C(10)-N(4)-Sn(1)        | 90.51(12)    | 91.42                        |
| C(15)-N(4)-Sn(1)        | 138.73(14)   | 138.74                       |
| N(1)-C(1)-C(2)          | 120.78(18)   | 120.57                       |

|                    |            |        |
|--------------------|------------|--------|
| N(1)-C(5)-C(4)     | 113.39(17) | 112.54 |
| N(1)-C(5)-H(5A)    | 108.9      | 109.37 |
| N(1)-C(5)-H(5B)    | 108.9      | 108.46 |
| N(2)-C(1)-C(2)     | 127.38(19) | 128.09 |
| N(2)-C(1)-N(1)     | 111.75(18) | 111.29 |
| N(2)-C(6)-C(7)     | 114.30(17) | 112.21 |
| N(2)-C(6)-C(8)     | 110.21(17) | 111.67 |
| N(2)-C(6)-C(9)     | 105.33(17) | 105.51 |
| N(3)-C(10)-C(11)   | 120.3(2)   | 121.26 |
| N(3)-C(14)-C(13)   | 114.04(17) | 112.43 |
| N(3)-C(14)-H(14A)  | 108.7      | 108.02 |
| N(3)-C(14)-H(14B)  | 108.7      | 109.44 |
| N(4)-C(10)-C(11)   | 127.62(19) | 127.62 |
| N(4)-C(10)-N(3)    | 112.01(18) | 111.07 |
| N(4)-C(15)-C(16)   | 111.22(18) | 111.36 |
| N(4)-C(15)-C(17)   | 112.93(18) | 112.16 |
| N(4)-C(15)-C(18)   | 106.08(17) | 105.86 |
| C(1)-N(1)-C(5)     | 123.85(17) | 124.11 |
| C(1)-N(2)-C(6)     | 127.62(18) | 128.51 |
| C(10)-N(3)-C(14)   | 123.69(18) | 125.11 |
| C(10)-N(4)-C(15)   | 126.98(18) | 128.5  |
| C(1)-C(2)-C(3)     | 113.37(17) | 111.6  |
| C(1)-C(2)-H(2A)    | 108.9      | 108.01 |
| C(1)-C(2)-H(2B)    | 108.9      | 110.5  |
| C(10)-C(11)-C(12)  | 112.23(18) | 112.17 |
| C(10)-C(11)-H(11A) | 109.2      | 110.27 |
| C(10)-C(11)-H(11B) | 109.2      | 107.73 |

---



**Table S4.** The selected bond length (Å) and angels (°) of **3**

| Geometrical parameters  | Experimental | DFT calculation <sup>a</sup> |
|-------------------------|--------------|------------------------------|
| <i>Bond Lengths (Å)</i> |              |                              |
| Sn(1)-N(1)              | 2.185(2)     | 2.176                        |
| Sn(1)-N(2)              | 2.364(2)     | 2.371                        |
| Sn(1)-N(3)              | 2.175(2)     | 2.176                        |
| Sn(1)-N(4)              | 2.349(2)     | 2.371                        |
| N(1)-C(1)               | 1.450(3)     | 1.458                        |
| N(1)-C(6)               | 1.338(3)     | 1.353                        |
| N(2)-C(6)               | 1.319(3)     | 1.335                        |
| N(2)-C(7)               | 1.468(3)     | 1.478                        |
| N(3)-C(11)              | 1.458(3)     | 1.458                        |
| N(3)-C(16)              | 1.339(3)     | 1.353                        |
| N(4)-C(16)              | 1.318(3)     | 1.335                        |
| N(4)-C(17)              | 1.475(3)     | 1.478                        |
| C(5)-C(6)               | 1.507(4)     | 1.513                        |
| C(15)-C(16)             | 1.517(3)     | 1.513                        |
| <i>Bond Angles (°)</i>  |              |                              |
| N(1)-Sn(1)-N(2)         | 57.97(8)     | 58.21                        |
| N(1)-Sn(1)-N(4)         | 86.79(8)     | 86.83                        |
| N(3)-Sn(1)-N(1)         | 95.01(8)     | 93.6                         |
| N(3)-Sn(1)-N(2)         | 87.27(8)     | 86.83                        |
| N(3)-Sn(1)-N(4)         | 58.14(8)     | 58.21                        |
| N(4)-Sn(1)-N(2)         | 129.06(7)    | 129.68                       |
| C(1)-N(1)-Sn(1)         | 138.11(18)   | 136.08                       |
| C(6)-N(1)-Sn(1)         | 98.34(16)    | 99.38                        |
| C(6)-N(2)-Sn(1)         | 90.75(15)    | 91.12                        |
| C(7)-N(2)-Sn(1)         | 139.69(17)   | 139.21                       |
| C(11)-N(3)-Sn(1)        | 137.46(18)   | 136.07                       |
| C(16)-N(3)-Sn(1)        | 98.48(15)    | 99.39                        |
| C(16)-N(4)-Sn(1)        | 91.17(14)    | 91.12                        |
| C(17)-N(4)-Sn(1)        | 138.92(17)   | 139.22                       |
| N(1)-C(1)-C(2)          | 114.1(2)     | 113.98                       |

|                    |          |        |
|--------------------|----------|--------|
| N(1)-C(1)-H(1A)    | 108.7    | 106.43 |
| N(1)-C(1)-H(1B)    | 108.7    | 111.2  |
| N(1)-C(6)-C(5)     | 120.2(2) | 120.66 |
| N(2)-C(6)-C(5)     | 127.3(2) | 128.07 |
| N(2)-C(6)-N(1)     | 112.6(2) | 111.22 |
| N(2)-C(7)-C(10)    | 105.5(2) | 105.83 |
| N(2)-C(7)-C(8)     | 111.7(2) | 111.57 |
| N(2)-C(7)-C(9)     | 112.9(2) | 111.87 |
| N(3)-C(11)-C(12)   | 114.3(2) | 113.99 |
| N(3)-C(11)-H(11A)  | 108.7    | 106.43 |
| N(3)-C(11)-H(11B)  | 108.7    | 111.19 |
| N(3)-C(16)-C(15)   | 120.3(2) | 120.66 |
| N(4)-C(16)-C(15)   | 127.5(2) | 128.07 |
| N(4)-C(16)-N(3)    | 112.1(2) | 111.22 |
| N(4)-C(17)-C(18)   | 111.5(2) | 111.57 |
| N(4)-C(17)-C(19)   | 112.2(2) | 111.88 |
| N(4)-C(17)-C(20)   | 105.1(2) | 105.83 |
| C(6)-N(1)-C(1)     | 123.5(2) | 124.17 |
| C(6)-N(2)-C(7)     | 127.7(2) | 128.51 |
| C(16)-N(3)-C(11)   | 123.0(2) | 124.17 |
| C(16)-N(4)-C(17)   | 127.7(2) | 128.5  |
| C(6)-C(5)-C(4)     | 111.9(2) | 112.05 |
| C(6)-C(5)-H(5A)    | 109.2    | 109.19 |
| C(6)-C(5)-H(5B)    | 109.2    | 109.33 |
| C(16)-C(15)-C(14)  | 111.8(2) | 112.05 |
| C(16)-C(15)-H(15A) | 109.3    | 109.19 |
| C(16)-C(15)-H(15B) | 109.3    | 109.33 |

---

## 7. Additional chemical properties of deposited film

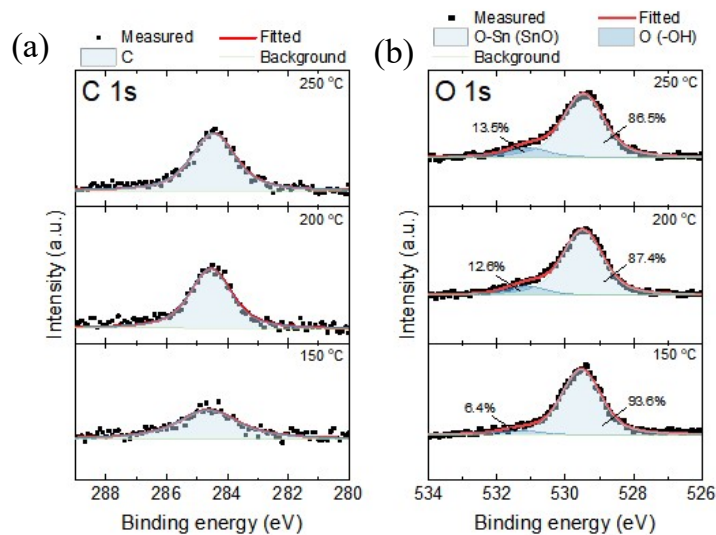

**Figure S5.** XPS spectra of the as-grown  $\text{Sn}_3\text{N}_4$  film depending on the growth temperature, respectively (a) C 1s and (b) O 1s.

Figure S5 shows the XPS spectra of as-deposited  $\text{Sn}_3\text{N}_4$  film at 150, 200, 250°C. As shown in Figure 7, the spectra were obtained by etching films for 5s with  $\text{Ar}^+$  ions to remove airborne carbon and oxygen contamination at the surface. The C 1s XPS spectra exhibited one peak at 284.5 eV corresponding to C-C bond in all temperature ranges (Figure S5(a)). The C content is within 5%, showing that there are almost no C impurities in the  $\text{Sn}_3\text{N}_4$  film. The O 1s XPS spectra had two sub-peaks at 529.5 and 531.2 eV corresponding to  $\text{SnO}_x$ , which is due to the oxidation in the air and hydroxyl group, respectively (Figure S5(b)). Especially, the peak corresponding to the hydroxyl group decreased with lower deposition temperature.

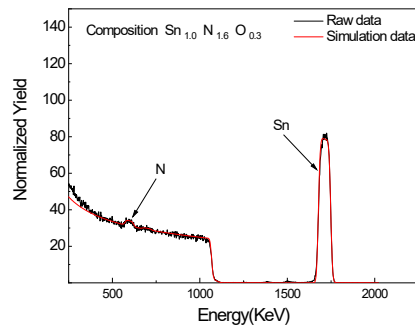

**Figure S6.** RBS spectrum for  $\text{Sn}_3\text{N}_4$  film deposited on  $\text{SiO}_2$  at 150°C (2MV accelerator).

Figure S6 shows the RBS spectrum for  $\text{Sn}_3\text{N}_4$  film deposited on  $\text{SiO}_2$  at 150°C to obtain the precise composition. The composition of each element is Sn: N: O = 1: 1.6: 0.3, and the amount of Sn and N correspond  $\text{Sn}_3\text{N}_4$  and contains a small amount of O due to the oxidation.

## 8. Calculation of geometry index of 1 – 3

$$\tau'4 = \frac{\beta - \alpha}{360^\circ - \theta} + \frac{180^\circ - \beta}{180^\circ - \theta} \approx -0.00399\alpha - 0.01019\beta + 2.55$$

where:  $\beta > \alpha$  are the two greatest valence angles of coordination center  
 $\theta = \cos^{-1}(-1/3) \approx 109.5^\circ$  is a tetrahedral angle

✓ **1:**  $\alpha:96.95, \beta:130.73, \tau'4 = 0.834$

✓ **2:**  $\alpha:101.98, \beta:130.14, \tau'4 = 0.819$

✓ **3:**  $\alpha:95.01, \beta:129.06, \tau'4 = 0.859$
